# Supplementary material for: Proteomic Analyses of Nucleoid-Associated Proteins in Escherichia coli, Pseudomonas aeruginosa, Bacillus subtilis, and Staphylococcus aureus
Source: PLoS One. 2011 Apr 26;6(4):e19172. doi: 10.1371/journal.pone.0019172 (PMC3082553; doi:10.1371/journal.pone.0019172)
Supplement: Table S3 — Proteins identified in the nucleoid fraction of the stationary phase of E. coli . (XLS) [file pone.0019172.s007.xls]

## Sheet: Sheet1
Table S. Protein Identified in the Nucleoid Fraction of Stationary Phase of E. coli
				emPAI			pep_num
gene ID	gene Name	Annotation 1	Annotation2	nucleoid	envelope	top fraction	nucleoid	envelope	top fraction
ecj:JW1225	HNS	hns; global DNA-binding transcriptional du	DNA-binding protein H-NS	0.96			10
ecj:JW0895	IHFB	ihfB; integration host factor (IHF), DNA-b	Integration host factor subunit beta	0.89			11
ecj:JW0797	DPS	dps; Fe-binding and storage protein; K0404	DNA protection during starvation protein	0.46	0.21	0.76	11	3	16
ecj:JW3964	DBHA	hupA; HU, DNA-binding transcriptional regu	DNA-binding protein HU-alpha	0.42			2
ecj:JW1702	IHFA	ihfA; integration host factor (IHF), DNA-b	Integration host factor subunit alpha	0.35			9
ecj:JW2644	STPA	stpA; DNA binding protein, nucleoid-associ	DNA-binding protein stpA	0.25			5
ecj:JW1728	OSME	osmE; DNA-binding transcriptional regulato	Osmotically-inducible lipoprotein E	0.75	1.32		7	16
ecj:JW0999	PUTA	putA; fused DNA-binding transcriptional re	Bifunctional protein putA	0.13	0.39	0.13	34	73	40
ecj:JW2807	LYSR	lysR; DNA-binding transcriptional dual reg	Transcriptional activator protein lysR	0.11			6
ecj:JW3257	RPOA	rpoA; RNA polymerase, alpha subunit; K0304	DNA-directed RNA polymerase subunit alpha	1.18	0.22	0.1	19	15	5
ecj:JW3624	RPOZ	rpoZ; RNA polymerase, omega subunit; K0306	DNA-directed RNA polymerase subunit omega	0.39			4
ecj:JW3943	EFTU	tufB; protein chain elongation factor EF-T	Elongation factor Tu	0.39	0.09	1.11	21	12	40
ecj:JW1850	RUVA	ruvA; component of RuvABC resolvasome, reg	Holliday junction ATP-dependent DNA helicase ruvA	0.17			3
ecj:JW3951	RPOC	rpoC; RNA polymerase, beta prime subunit;	DNA-directed RNA polymerase subunit beta~	0.15	0.1	0.21	44	28	32
ecj:JW3950	RPOB	rpoB; RNA polymerase, beta subunit; K03043	DNA-directed RNA polymerase subunit beta	0.13	0.05	0.18	44	37	53
ecj:JW0165	EFTS	tsf; protein chain elongation factor EF-Ts	Elongation factor Ts	0.12	0.12	0.6	16	17	24
ecj:JW0384	RDGC	rdgC; DNA-binding protein, non-specific; K	Recombination-associated protein rdgC	0.11	0.11		16	10
ecj:JW2174	NDPA	yejK; nucleotide associated protein; K0689	Nucleoid-associated protein ndpA	0.1			12
ecj:JW1266	TOP1	topA; DNA topoisomerase I, omega subunit;	DNA topoisomerase 1	0.08			26
ecj:JW5905	HRPA	hrpA; ATP-dependent helicase; K03578 ATP-d	ATP-dependent RNA helicase hrpA	0.05	0.02	0.05	28	20	27
ecj:JW3039	RPOD	rpoD; RNA polymerase, sigma 70 (sigma D) f	RNA polymerase sigma factor rpoD	0.05		0.05	17		15
ecj:JW4019	UVRA	uvrA; ATPase and DNA damage recognition pr	UvrABC system protein A	0.04	0.04		25	23
ecj:JW0538	RUSA	rusA; endonuclease RUS; K01160 crossover j	Crossover junction endodeoxyribonuclease rusA	0			7
ecj:JW3304	RS12	rpsL; 30S ribosomal subunit protein S12; K	30S ribosomal protein S12	0.64	0.28	0.64	6	9	7
ecj:JW3946	RL11	rplK; 50S ribosomal subunit protein L11; K	50S ribosomal protein L11	0.59	1.01	0.59	9	11	14
ecj:JW4158	RS6	rpsF; 30S ribosomal subunit protein S6; K0	30S ribosomal protein S6	0.58	0.58	1.43	10	10	14
ecj:JW4161	RL9	rplI; 50S ribosomal subunit protein L9; K0	50S ribosomal protein L9	0.55	0.25	0.94	4	18	22
ecj:JW3200	RL13	rplM; 50S ribosomal subunit protein L13; K	50S ribosomal protein L13	0.55	0.24	0.55	12	7	8
ecj:JW2590	RS16	rpsP; 30S ribosomal subunit protein S16; K	30S ribosomal protein S16	0.44		1.07	2		3
ecj:JW0022	RS20	rpsT; 30S ribosomal subunit protein S20; K	30S ribosomal protein S20	0.42		1.01	4		4
ecj:JW3280	RL23	rplW; 50S ribosomal subunit protein L23; K	50S ribosomal protein L23	0.36	0.36	0.36	4	7	6
ecj:JW3259	RS11	rpsK; 30S ribosomal subunit protein S11; K	30S ribosomal protein S11	0.28		0.28	7		7
ecj:JW3199	RS9	rpsI; 30S ribosomal subunit protein S9; K0	30S ribosomal protein S9	0.26	2.21	1.54	6	13	13
ecj:JW3267	RL6	rplF; 50S ribosomal subunit protein L6; K0	50S ribosomal protein L6	0.2	0.74	0.45	7	7	11
ecj:JW3282	RL3	rplC; 50S ribosomal subunit protein L3; K0	50S ribosomal protein L3	0.17	0.17	0.89	12	14	18
ecj:JW3258	RS4	rpsD; 30S ribosomal subunit protein S4; K0	30S ribosomal protein S4	0.16	0.16	0.82	5	10	16
ecj:JW3947	RL1	rplA; 50S ribosomal subunit protein L1; K0	50S ribosomal protein L1	0.15	0.33		16	15
ecj:JW0894	RS1	rpsA; 30S ribosomal subunit protein S1; K0	30S ribosomal protein S1	0.13	0.19	0.19	10	21	22
ecj:JW2640	YGAU	ygaU; hypothetical protein	Uncharacterized protein ygaU	2.66	0.91		12	18
ecj:JW3710	ATPB	atpD; F1 sector of membrane-bound ATP synt	ATP synthase subunit beta	1.36	1.92	0.15	38	39	16
ecj:JW3713	ATPD	atpH; F1 sector of membrane-bound ATP synt	ATP synthase subunit delta	0.72	0.44		11	9
ecj:JW2276	NUOI	nuoI; NADH:ubiquinone oxidoreductase, chai	NADH-quinone oxidoreductase subunit I	0.65	0.4		13	14
ecj:JW0713	DHSA	sdhA; succinate dehydrogenase, flavoprotei	Succinate dehydrogenase flavoprotein subunit	0.56	0.74		30	35
ecj:JW4103	CH60	groL; Cpn60 chaperonin GroEL, large subuni	60 kDa chaperonin	0.55	0.37	0.76	39	28	44
ecj:JW1606	YDGA	ydgA; conserved hypothetical protein	Protein ydgA	0.49	0.3	0.14	17	22	12
ecj:JW0714	DHSB	sdhB; succinate dehydrogenase, FeS subunit	Succinate dehydrogenase iron-sulfur subunit	0.48	0.3		17	15
ecj:JW0013	DNAK	dnaK; chaperone Hsp70, co-chaperone with D	Chaperone protein dnaK	0.37	0.11	0.87	26	18	34
ecj:JW1228	ADHE	adhE; fused acetaldehyde-CoA dehydrogenase	Aldehyde-alcohol dehydrogenase	0.35	0.16	0.08	33	21	21
ecj:JW3509	DPPF	dppF; dipeptide transporter; K02032 peptid	Dipeptide transport ATP-binding protein dppF	0.33	0.21		12	13
ecj:JW5875	NUOB	nuoB; NADH:ubiquinone oxidoreductase, chai	NADH-quinone oxidoreductase subunit B	0.32			14
ecj:JW0794	GLNQ	glnQ; glutamine transporter subunit; K1003	Glutamine transport ATP-binding protein glnQ	0.3	0.14		11	8
ecj:JW1462	NARY	narY; nitrate reductase 2 (NRZ), beta subu	Respiratory nitrate reductase 2 beta chain	0.27			24
ecj:JW3205	MDH	mdh; malate dehydrogenase, NAD(P)-binding;	Malate dehydrogenase	0.25		0.12	7		17
ecj:JW0429	LON	lon; DNA-binding ATP-dependent protease La	ATP-dependent protease La	0.23			36
ecj:JW1806	PTNAB	manX; fused mannose-specific PTS enzyme II	PTS system mannose-specific EIIAB component	0.23	0.11		9	15
ecj:JW3686	TNAA	tnaA; tryptophanase/L-cysteine desulfhydra	Tryptophanase	0.23	0.23	1.76	22	26	45
ecj:JW0111	ODP2	aceF; pyruvate dehydrogenase, dihydrolipoy	Dihydrolipoyllysine-residue acetyltransferase component of pyruvate dehydrogenase complex	0.18	0.12	0.06	36	19	21
ecj:JW1541	NOHA	nohA; predicted packaging protein	Putative prophage Qin DNA-packaging protein NU1 homolog	0.18			8
ecj:JW0989	WRBA	wrbA; predicted flavoprotein in Trp regula	Flavoprotein wrbA	0.18	0.18	0.4	7	8	12
ecj:JW2140	GCH1	folE; GTP cyclohydrolase I; K01495 GTP cyc	GTP cyclohydrolase 1	0.15			10
ecj:JW5162	LOLD	lolD; outer membrane-specific lipoprotein	Lipoprotein-releasing system ATP-binding protein lolD	0.15			10
ecj:JW1165	MINC	minC; cell division inhibitor; K03610 sept	Probable septum site-determining protein minC	0.15		0.15	5		5
ecj:JW1666	KPYK1	pykF; pyruvate kinase I; K00873 pyruvate k	Pyruvate kinase I	0.15		0.76	18		30
ecj:JW0286	MATC	yagY; hypothetical protein	Uncharacterized protein matC	0.15			3
ecj:JW3712	ATPA	atpA; F1 sector of membrane-bound ATP synt	ATP synthase subunit alpha	0.14	0.3	0.07	23	19	20
ecj:JW4114	FRDB	frdB; fumarate reductase (anaerobic), Fe-S	Fumarate reductase iron-sulfur subunit	0.14			4
ecj:JW1487	GADC	gadC; predicted glutamate:gamma-aminobutyr	Probable glutamate/gamma-aminobutyrate antiporter	0.14	0.39	0.07	7	10	6
ecj:JW3808	UDP	udp; uridine phosphorylase; K00757 uridine	Uridine phosphorylase	0.14		0.3	8		9
ecj:JW3168	YHBG	yhbG; predicted transporter subunit	Uncharacterized ABC transporter ATP-binding protein yhbG	0.14	0.3		14	12
ecj:JW5867	AIDB	aidB; isovaleryl CoA dehydrogenase; K09456	Protein aidB	0.13			13
ecj:JW3690	YIEE	yieE; predicted phosphopantetheinyl transf	Uncharacterized protein yieE	0.13			9
ecj:JW3711	ATPG	atpG; F1 sector of membrane-bound ATP synt	ATP synthase gamma chain	0.12	0.25		14	13
ecj:JW1950	HCHA	hchA; Hsp31 molecular chaperone; K05523 mo	Chaperone protein hchA	0.12	0.12	0.12	12	8	10
ecj:JW5375	NUOCD	nuoC; NADH:ubiquinone oxidoreductase, chai	NADH-quinone oxidoreductase subunit C/D	0.11		0.05	17		15
ecj:JW2019	YEFG	wbbI; conserved hypothetical protein	Uncharacterized protein yefG	0.1			6
ecj:JW0317	YAHK	yahK; predicted oxidoreductase, Zn-depende	Uncharacterized zinc-type alcohol dehydrogenase-like protein yahK	0.1		0.45	5		15
ecj:JW0093	FTSZ	ftsZ; GTP-binding tubulin-like cell divisi	Cell division protein ftsZ	0.09	0.86	0.09	29	28	22
ecj:JW3592	KBL	kbl; glycine C-acetyltransferase; K00639 g	2-amino-3-ketobutyrate coenzyme A ligase	0.09	0.18	0.18	10	25	15
ecj:JW3995	MALK	malK; fused maltose transport subunit, ATP	Maltose/maltodextrin import ATP-binding protein malK	0.09	0.19		16	17
ecj:JW2893	PGK	pgk; phosphoglycerate kinase; K00927 phosp	Phosphoglycerate kinase	0.09	0.09	0.54	8	6	30
ecj:JW2486	PPK	ppk; polyphosphate kinase, component of RN	Polyphosphate kinase	0.09		0.05	13		20
ecj:JW0110	ODP1	aceE; pyruvate dehydrogenase, decarboxylas	Pyruvate dehydrogenase E1 component	0.08	0.08	0.24	19	19	34
ecj:JW2652	PROV	proV; glycine betaine transporter subunit;	Glycine betaine/L-proline transport ATP-binding protein proV	0.08			12
ecj:JW0595	YBDN	ybdN; conserved hypothetical protein	Uncharacterized protein ybdN	0.08			9
ecj:JW1412	ALDA	aldA; aldehyde dehydrogenase A, NAD-linked	Lactaldehyde dehydrogenase	0.07	0.32	0.62	14	13	27
ecj:JW3728	RBSA	rbsA; fused D-ribose transporter subunits	Ribose import ATP-binding protein rbsA	0.07			25
ecj:JW4115	FRDA	frdA; fumarate reductase (anaerobic) catal	Fumarate reductase flavoprotein subunit	0.06	0.31	0.06	24	18	13
ecj:JW1216	NARH	narH; nitrate reductase 1, beta (Fe-S) sub	Respiratory nitrate reductase 1 beta chain	0.06			14
ecj:JW0855	POXB	poxB; pyruvate dehydrogenase (pyruvate oxi	Pyruvate dehydrogenase [cytochrome]	0.06			12
ecj:JW2168	YEJF	yejF; fused predicted oligopeptide transpo	Uncharacterized ABC transporter ATP-binding protein yejF	0.06	0		7	11
ecj:JW3379	MALQ	malQ; 4-alpha-glucanotransferase; K00705 4	4-alpha-glucanotransferase	0.05			15
ecj:JW1463	NARZ	narZ; nitrate reductase 2 (NRZ), alpha sub	Respiratory nitrate reductase 2 alpha chain	0.05	0.03		36	28
ecj:JW5380	MNMC	trmC; fused 5-methylaminomethyl-2-thiourid	tRNA 5-methylaminomethyl-2-thiouridine biosynthesis bifunctional protein mnmC	0.05			7
ecj:JW0114	ACON2	acnB; bifunctional aconitate hydratase 2 a	Aconitate hydratase 2	0.04	0.12	0.47	18	19	40
ecj:JW5689	PHSM	malP; maltodextrin phosphorylase; K00688 s	Maltodextrin phosphorylase	0.04	0.04		17	13
ecj:JW0886	PFLB	pflB; pyruvate formate lyase I; K00656 for	Formate acetyltransferase 1	0.04	0.24	0.18	18	30	33
ecj:JW5555	PTFX2	ptsA; fused predicted PTS enzymes Hpr comp	Multiphosphoryl transfer protein 2	0.04			15
ecj:JW1309	YCJT	ycjT; predicted hydrolase; K04844 hypothet	Uncharacterized glycosyl hydrolase ycjT	0.04			9
ecj:JW1215	NARG	narG; nitrate reductase 1, alpha subunit;	Respiratory nitrate reductase 1 alpha chain	0.03			22
ecj:JW2609	YFJL	yfjL; hypothetical protein	Uncharacterized protein yfjL	0			10
ecj:JW2725	YGBT	ygbT; conserved hypothetical protein	Uncharacterized protein ygbT	0			7
ecj:JW0940	OMPA	ompA; outer membrane protein A (3a;II*;G;d	Outer membrane protein A	7.27	10.03	0.21	88	93	12
ecj:JW2203	OMPC	ompC; outer membrane porin protein C; K094	Outer membrane protein C	6.75	3.54	0.31	66	50	10
ecj:JW1667	LPP	lpp; murein lipoprotein; K06078 murein lip	Major outer membrane lipoprotein	6.4	15.48	2.32	20	24	4
ecj:JW0912	OMPF	ompF; outer membrane porin 1a (Ia;b;F); K0	Outer membrane protein F	2.27	1.07		23	17
ecj:JW0397	YAJC	yajC; SecYEG protein translocase auxillary	UPF0092 membrane protein yajC	1.37			5
ecj:JW0554	OMPT	ompT; outer membrane protease VII; K01355	Protease 7	1.02	0.65		18	12
ecj:JW5539	YHCB	yhcB; conserved hypothetical protein; K099	Putative cytochrome d ubiquinol oxidase subunit 3	1	0.26		9	7
ecj:JW4108	ECNB	ecnB; entericidin B membrane lipoprotein	Entericidin B	0.9	0.9	0.9	2	2	3
ecj:JW3714	ATPF	atpF; F0 sector of membrane-bound ATP synt	ATP synthase subunit b	0.83	0.83	0.22	13	8	8
ecj:JW0799	OMPX	ompX; outer membrane protein; K11934 outer	Outer membrane protein X	0.76			8
ecj:JW1908	FLIC	fliC; flagellar filament structural protei	Flagellin	0.75	0.23	0.52	20	16	18
ecj:JW4132	HFLK	hflK; modulator for HflB protease specific	Protein hflK	0.74	0.61		18	25
ecj:JW0849	YBJP	ybjP; predicted lipoprotein	Uncharacterized lipoprotein ybjP	0.73	0.44		9	8
ecj:JW3160	YRBD	yrbD; predicted ABC-type organic solvent t	Uncharacterized protein yrbD	0.71	0.2		7	4
ecj:JW4110	BLC	blc; outer membrane lipoprotein; K03098 ou	Outer membrane lipoprotein blc	0.7		0.19	7		9
ecj:JW3474	SLP	slp; outer membrane lipoprotein; K07285 ou	Outer membrane protein slp	0.65	0.4	0.18	5	6	5
ecj:JW1200	LOLB	lolB; chaperone for lipoproteins; K02494 o	Outer-membrane lipoprotein lolB	0.57	0.16		11	7
ecj:JW1633	SLYB	slyB; outer membrane lipoprotein; K06077 o	Outer membrane lipoprotein slyB	0.56	0.95		7	8
ecj:JW3864	FDOH	fdoH; formate dehydrogenase-O, Fe-S subuni	Formate dehydrogenase-O iron-sulfur subunit	0.52	0.37		10	9
ecj:JW2283	NUOA	nuoA; NADH:ubiquinone oxidoreductase, memb	NADH-quinone oxidoreductase subunit A	0.52	0.52		5	7
ecj:JW0422	CYOA	cyoA; cytochrome o ubiquinol oxidase subun	Ubiquinol oxidase subunit 2	0.51	0.36		22	22
ecj:JW3351	DAMX	damX; hypothetical protein; K03112 DamX pr	Protein damX	0.48	0.26		9	9
ecj:JW2500	RODZ	yfgA; conserved hypothetical protein	Cytoskeleton protein rodZ	0.48	0.1		8	3
ecj:JW4133	HFLC	hflC; modulator for HflB protease specific	Protein hflC	0.46	0.46		21	18
ecj:JW0731	PAL	pal; peptidoglycan-associated outer membra	Peptidoglycan-associated lipoprotein	0.45	1.1	0.2	12	12	5
ecj:JW3996	LAMB	lamB; maltose outer membrane porin; K02024	Maltoporin	0.43	0.24	0.07	11	16	8
ecj:JW5682	DCRB	dcrB; periplasmic protein	Protein dcrB	0.42	0.42		8	5
ecj:JW0452	ACRA	acrA; multidrug efflux system; K03585 memb	Acriflavine resistance protein A	0.41	0.53		14	17
ecj:JW3775	HEMX	hemX; uroporphyrinogen III methylase; K024	Putative uroporphyrinogen-III C-methyltransferase	0.4	0.18		14	13
ecj:JW3027	YGIM	htrG; predicted signal transduction protei	Uncharacterized protein ygiM	0.36			7
ecj:JW3069	YQJD	yqjD; conserved hypothetical protein	Uncharacterized protein yqjD	0.36	0.36	0.85	5	5	6
ecj:JW1087	PTGCB	ptsG; fused glucose-specific PTS enzyme II	PTS system glucose-specific EIICB component	0.33	0.15		8	7
ecj:JW5655	YIAF	yiaF; conserved hypothetical protein	Uncharacterized protein yiaF	0.32	0.15		5	7
ecj:JW1982	AG43	flu; antigen 43 (Ag43) phase-variable biof	Antigen 43	0.31	0.31	0.07	33	22	19
ecj:JW5503	TOLC	tolC; transport channel; K03287 outer memb	Outer membrane protein tolC	0.31	0.5		15	18
ecj:JW3481	MDTE	mdtE; multidrug resistance efflux transpor	Multidrug resistance protein mdtE	0.3	0.68	0.09	18	15	6
ecj:JW1371	OMPN	ompN; outer membrane pore protein N, non-s	Outer membrane protein N	0.3	0.19	0.09	13	8	9
ecj:JW0736	YBGS	ybgS; conserved hypothetical protein	Uncharacterized protein ybgS	0.3			2
ecj:JW3145	FTSH	ftsH; protease, ATP-dependent zinc-metallo	Cell division protease ftsH	0.29	0.23	0.05	31	32	19
ecj:JW0120	DHG	gcd; glucose dehydrogenase; K00117 quinopr	Quinoprotein glucose dehydrogenase	0.28	0.18		15	17
ecj:JW4318	MCP1	tsr; methyl-accepting chemotaxis protein I	Methyl-accepting chemotaxis protein I	0.28	0.06		11	11
ecj:JW0192	RCSF	rcsF; predicted outer membrane protein, si	Protein rcsF	0.27			6
ecj:JW4113	FRDC	frdC; fumarate reductase (anaerobic), memb	Fumarate reductase subunit C	0.26	0.26		6	4
ecj:JW3252	MSCL	mscL; mechanosensitive channel; K03282 lar	Large-conductance mechanosensitive channel	0.26			7
ecj:JW3683	OXAA	yidC; cytoplasmic insertase into membrane	Inner membrane protein oxaA	0.26	0.06		9	16
ecj:JW2341	FADL	fadL; long-chain fatty acid outer membrane	Long-chain fatty acid transport protein	0.25	0.25		12	10
ecj:JW3586	YIBN	yibN; predicted rhodanese-related sulfurtr	Uncharacterized protein yibN	0.25			4
ecj:JW0431	PPID	ppiD; peptidyl-prolyl cis-trans isomerase;	Peptidyl-prolyl cis-trans isomerase D	0.24	0.17		22	25
ecj:JW3865	FDOG	fdoG; formate dehydrogenase-O, large subun	Formate dehydrogenase-O major subunit	0.21	0.14		34	23
ecj:JW2462	NLPB	nlpB; lipoprotein; K07287 lipoprotein-34	Lipoprotein 34	0.21	0.34		12	9
ecj:JW2971	YQHA	yqhA; conserved inner membrane protein	UPF0114 protein yqhA	0.21			6
ecj:JW3219	MREC	mreC; cell wall structural complex MreBCD	Rod shape-determining protein mreC	0.2			15
ecj:JW1875	MCP2	tar; methyl-accepting chemotaxis protein I	Methyl-accepting chemotaxis protein II	0.2	0.13		14	13
ecj:JW3119	YRAP	yraP; hypothetical protein	Uncharacterized protein yraP	0.19			4
ecj:JW0053	LPTD	imp; exported protein required for envelop	LPS-assembly protein precursor	0.18	0.18		20	21
ecj:JW4338	OSMY	osmY; periplasmic protein; K04065 hyperosm	Osmotically-inducible protein Y	0.18		0.65	10		8
ecj:JW0636	RLPB	rlpB; minor lipoprotein; K03643 LPS-assemb	LPS-assembly lipoprotein rlpB precursor	0.18	0.18	0.18	11	9	7
ecj:JW1795	YEAY	yeaY; predicted lipoprotein; K07285 outer	Uncharacterized lipoprotein yeaY	0.18	0.18		7	4
ecj:JW1427	YDCL	ydcL; predicted lipoprotein	Uncharacterized lipoprotein ydcL	0.16	1.06		11	13
ecj:JW2577	YFIO	yfiO; predicted lipoprotein; K05807 putati	UPF0169 lipoprotein yfiO	0.14			9
ecj:JW2903	YGGG	yggG; predicted peptidase; K07387 putative	Uncharacterized metalloprotease yggG	0.14		0.14	6		4
ecj:JW0722	CYDA	cydA; cytochrome d terminal oxidase, subun	Cytochrome d ubiquinol oxidase subunit 1	0.13	0.06		11	15
ecj:JW2406	CYSZ	cysZ; predicted inner membrane protein; K0	Protein cysZ	0.13			5
ecj:JW0193	METQ	metQ; DL-methionine transporter subunit; K	D-methionine-binding lipoprotein metQ	0.13			4
ecj:JW5687	GLPG	glpG; predicted intramembrane serine prote	Rhomboid protease glpG	0.12			3
ecj:JW2135	MGLC	mglC; methyl-galactoside transporter subun	Galactoside transport system permease protein mglC	0.11			4
ecj:JW0399	SECF	secF; SecYEG protein translocase auxillary	Protein-export membrane protein secF	0.11	0.22		7	9
ecj:JW0478	QMCA	ybbK; predicted protease, membrane anchore	Protein qmcA	0.11			12
ecj:JW0451	ACRB	acrB; multidrug efflux system protein; K03	Acriflavine resistance protein B	0.1	0.03		16	18
ecj:JW5836	WZZB	cld; regulator of length of O-antigen comp	Chain length determinant protein	0.1			12
ecj:JW3904	FTSN	ftsN; essential cell division protein; K03	Cell division protein ftsN	0.1	0.1		11	9
ecj:JW2552	LEP	lepB; leader peptidase; K03100 signal pept	Signal peptidase I	0.1			9
ecj:JW2277	NUOH	nuoH; NADH:ubiquinone oxidoreductase, memb	NADH-quinone oxidoreductase subunit H	0.1	0.1		8	3
ecj:JW0628	RLPA	rlpA; minor lipoprotein; K03642 rare lipop	Rare lipoprotein A	0.1	0.1		7	9
ecj:JW1336	ZNTB	ydaN; predicted Zn(II) transporter; K03284	Zinc transport protein zntB	0.1	0.1		9	7
ecj:JW3454	YHII	yhiI; predicted HlyD family secretion prot	Uncharacterized protein yhiI	0.1			12
ecj:JW3490	YHJD	yhjD; conserved inner membrane protein; K0	Inner membrane protein yhjD	0.1			11
ecj:JW0473	COPA	copA; copper transporter; K01533 Cu2+-expo	Copper-transporting P-type ATPase	0.09	0.09		20	14
ecj:JW0723	CYDB	cydB; cytochrome d terminal oxidase, subun	Cytochrome d ubiquinol oxidase subunit 2	0.09	0.18		4	2
ecj:JW0823	DACC	dacC; D-alanyl-D-alanine carboxypeptidase;	D-alanyl-D-alanine carboxypeptidase dacC	0.09	0.09		14	11
ecj:JW2660	EMRA	emrA; multidrug efflux system; K03543 mult	Multidrug resistance protein A	0.09			10
ecj:JW3580	LLDD	lldD; L-lactate dehydrogenase, FMN-linked;	L-lactate dehydrogenase [cytochrome]	0.09			15
ecj:JW0862	MACA	macA; macrolide transporter subunit, membr	Macrolide-specific efflux protein macA	0.09			15
ecj:JW2389	NUPC	nupC; nucleoside (except guanosine) transp	Nucleoside permease nupC	0.09	0.09		13	10
ecj:JW5601	WZZE	wzzE; Entobacterial Common Antigen (ECA) p	Lipopolysaccharide biosynthesis protein wzzE	0.09	0.09		14	15
ecj:JW3774	HEMY	hemY; predicted protoheme IX synthesis pro	Protein hemY	0.08			14
ecj:JW0171	RSEP	yaeL; zinc metallopeptidase; K11749 regula	Regulator of sigma E protease	0.08	0.08		9	10
ecj:JW0172	YAET	yaeT; conserved hypothetical protein; K072	Outer membrane protein assembly factor yaeT	0.08	0.13		18	19
ecj:JW4299	YJIN	yjiN; conserved inner membrane protein	Uncharacterized protein yjiN	0.08			16
ecj:JW2813	YQEG	yqeG; predicted transporter	Inner membrane transport protein yqeG	0.08			3
ecj:JW3043	AER	aer; fused signal transducer for aerotaxis	Aerotaxis receptor	0.07			11
ecj:JW3882	CPXA	cpxA; sensory histidine kinase in two-comp	Sensor protein cpxA	0.07			15
ecj:JW2234	GLPT	glpT; sn-glycerol-3-phosphate transporter;	Glycerol-3-phosphate transporter	0.07			3
ecj:JW3482	MDTF	mdtF; multidrug transporter, RpoS-dependen	Multidrug resistance protein mdtF	0.07	0.18	0.03	25	25	13
ecj:JW3460	PITA	pitA; phosphate transporter, low-affinity;	Low-affinity inorganic phosphate transporter 1	0.07			7
ecj:JW1001	PUTP	putP; proline:sodium symporter; K11928 sod	Sodium/proline symporter	0.07			8
ecj:JW4199	PTTBC	treB; fused trehalose(maltose)-specific en	PTS system trehalose-specific EIIBC component	0.07	0.07		6	5
ecj:JW4028	ACTP	actP; acetate transporter; K03307 solute:N	Cation/acetate symporter actP	0.06			9
ecj:JW2154	PTFBC	fruA; fused fructose-specific PTS enzyme I	PTS system fructose-specific EIIBC component	0.06			10
ecj:JW0082	FTSI	ftsI; transpeptidase involved in septal pe	Peptidoglycan synthetase ftsI	0.06			11
ecj:JW1874	MCP4	tap; methyl-accepting protein IV; K05877 m	Methyl-accepting chemotaxis protein IV	0.06			14
ecj:JW5062	YLAB	ylaB; conserved inner membrane protein	Uncharacterized protein ylaB	0.06			6
ecj:JW2142	CIRA	cirA; ferric iron-catecholate outer membra	Colicin I receptor	0.05			10
ecj:JW0421	CYOB	cyoB; cytochrome o ubiquinol oxidase subun	Ubiquinol oxidase subunit 1	0.05			11
ecj:JW3573	PTM3C	mtlA; fused mannitol-specific PTS enzyme I	PTS system mannitol-specific EIICBA component	0.05	0.11		12	15
ecj:JW0665	PTW3C	nagE; fused N-acetyl glucosamine specific	PTS system N-acetylglucosamine-specific EIICBA component	0.05	0.11		8	8
ecj:JW3492	YHJG	yhjG; predicted outer membrane biogenesis	Uncharacterized protein yhjG	0.05	0.05		20	20
ecj:JW5020	FADE	fadE; acyl coenzyme A dehydrogenase; K0644	Acyl-coenzyme A dehydrogenase	0.04	0.04		16	14
ecj:JW4251	FECA	fecA; ferric citrate outer membrane transp	Fe(3+) dicitrate transport protein fecA	0.04	0.09		22	12
ecj:JW5780	FIMD	fimD; outer membrane usher protein, type 1	Outer membrane usher protein focD	0.04	0.08	0.04	17	24	13
ecj:JW4201	ATMA	mgtA; magnesium transporter; K01531 Mg2+-i	Magnesium-transporting ATPase P-type 1	0.04			12
ecj:JW1823	YEBT	yebT; conserved hypothetical protein	Uncharacterized protein yebT	0.04	0.08		17	15
ecj:JW0454	KEFA	kefA; fused mechanosensitive channel prote	Potassium efflux system kefA	0.03	0.06		15	16
ecj:JW0557	NFRA	nfrA; bacteriophage N4 receptor, outer mem	Bacteriophage N4 adsorption protein A	0.03			14
