# Supplementary material for: Proteomic Analyses of Nucleoid-Associated Proteins in Escherichia coli, Pseudomonas aeruginosa, Bacillus subtilis, and Staphylococcus aureus
Source: PLoS One. 2011 Apr 26;6(4):e19172. doi: 10.1371/journal.pone.0019172 (PMC3082553; doi:10.1371/journal.pone.0019172)
Supplement: Table S10 — csNAPs of E. coli in the stationary phase. (XLS) [file pone.0019172.s014.xls]

## Sheet: Sheet1
Table S10. csNAPs of log phase of P. aeruginosa
				emPAI			pep_num
gene ID	gene Name	Annotation 1	Annotation2	nucleoid	top fraction	envelope	envelope	nucleoid	top fraction	DBS	RBS
pae:PA4944	HFQ	hfq; RNA-binding protein Hfq ; K03666 host	Protein hfq	1.09			5			10.9756	10.9756
pae:PA1804	DBHB	hupB; DNA-binding protein HU ; K03530 DNA-	DNA-binding protein HU-beta	1.09			3			11.1111	20
pae:PA5348	DBHA	putative DNA-binding protein ; K05787 DNA-	DNA-binding protein HU-alpha	0.42			2			17.7778	22.2222
pae:PA4853	FISL	fis; DNA-binding protein fis ; K03557 Fis	Putative fis-like DNA-binding protein	0.34			2			15.8879	15.8879
pae:PA4753	Y4753	hypothetical protein ; K07574 putative RNA	Probable RNA-binding protein PA4753	0.8			4			8.65385	15.3846
pae:PA0652	VFR	vfr; cAMP-regulatory protein ; K10914 CRP/	Cyclic AMP receptor-like protein	0.16			2			11.6822	13.0841
pae:PA3184	HEXR	DNA-binding transcriptional regulator HexR	HTH-type transcriptional regulator hexR	0.41			5			10.1754	7.36842
pae:PA3263	RDGC	rdgC; recombination associated protein ; K	Recombination-associated protein rdgC	1.56	0.23		17	5		7.51634	9.15033
pae:PA4238	RPOA	rpoA; DNA-directed RNA polymerase subunit	DNA-directed RNA polymerase subunit alpha	1.18		0.22	23		5	6.00601	9.00901
pae:PA2743	IF3	infC; translation initiation factor IF-3 ;	Translation initiation factor IF-3	0.4			5			9.28962	13.6612
pae:PA4234	UVRA	uvrA; excinuclease ABC subunit A ; K03701	UvrABC system protein A	0.27	0.07	0	13	4	2	10.3704	14.4974
pae:PA3011	TOP1	topA; DNA topoisomerase I (EC:5.99.1.2); K	DNA topoisomerase 1	0.25			12			14.0553	17.6267
pae:PA3849	NDPA	ndpA; nucleoid-associated protein NdpA ; K	Nucleoid-associated protein ndpA	0.21			8			9.58084	10.1796
pae:PA4964	PARC	parC; DNA topoisomerase IV subunit A ; K02	DNA topoisomerase 4 subunit A	0.14			10			9.01857	13.3952
pae:PA0576	RPOD	rpoD; RNA polymerase sigma factor RpoD ; K	RNA polymerase sigma factor rpoD	0.11			17			11.5073	12.966
pae:PA3620	MUTS	mutS; DNA mismatch repair protein MutS ; K	DNA mismatch repair protein mutS	0.08	0.04		7	2		8.07018	11.2281
pae:PA4254	RS17	rpsQ; 30S ribosomal protein S17 ; K02961 s	30S ribosomal protein S17	0.95			2			18.1818	19.3182
pae:PA4433	RL13	rplM; 50S ribosomal protein L13 ; K02871 l	50S ribosomal protein L13	0.92			5			18.3099	21.831
pae:PA4627	RSMC	hypothetical protein ; K00564 ribosomal RN	Ribosomal RNA small subunit methyltransferase C	0.1			2			10.5422	10.241
pae:PA3653	RRF	frr; ribosome recycling factor ; K02838 ri	Ribosome-recycling factor	0.41			2			11.3514	14.5946
pae:PA2975	RLUC	rluC; ribosomal large subunit pseudouridin	Ribosomal large subunit pseudouridine synthase C	0.11			2			10.3774	13.2075
pae:PA4053	RISB	ribH; 6,7-dimethyl-8-ribityllumazine synth	6 7-dimethyl-8-ribityllumazine synthase	0.53			3			6.32911	6.32911
pae:PA3831	AMPA	pepA; leucyl aminopeptidase (EC:3.4.11.1);	Cytosol aminopeptidase	0.51			13			8.28283	10.303
pae:PA4762	GRPE	grpE; heat shock protein GrpE ; K03687 mol	Protein grpE	0.41			3			4.30108	5.37634
pae:PA3152	HIS52	hisH; imidazole glycerol phosphate synthas	Imidazole glycerol phosphate synthase subunit hisH 2	0.36			3			5.94059	8.41584
pae:PA5172	OTCC	arcB; ornithine carbamoyltransferase (EC:2	Glutamate-1-semialdehyde 2 1-aminomutase	0.32			7			7.14286	10.119
pae:PA5119	GLNA	glnA; glutamine synthetase ; K01915 glutam	Glutamine synthetase	0.23			7			8.31557	10.2345
pae:PA0402	PYRB	pyrB; aspartate carbamoyltransferase catal	Aspartate carbamoyltransferase	0.22			5			9.88024	11.3772
pae:PA3626	TRUD	truD, ygbO; tRNA pseudouridine synthase D	tRNA pseudouridine synthase D	0.2			3			9.29577	10.7042
pae:PA4473	Y4473	hypothetical protein ; K09889 hypothetical	UPF0307 protein PA4473	0.19			2			11	15
pae:PA5331	PYRE	pyrE; orotate phosphoribosyltransferase (E	Orotate phosphoribosyltransferase	0.16			2			7.98122	8.92019
pae:PA5263	ARLY	argH; argininosuccinate lyase (EC:4.3.2.1)	Argininosuccinate lyase	0.15			8			9.48276	11.4224
pae:PA2638	NUOB	nuoB; NADH dehydrogenase subunit B (EC:1.6	NADH-quinone oxidoreductase subunit B	0.15			4			6.66667	8.44444
pae:PA4010	3MGH	3-methyladenine DNA glycosylase ; K03652 D	Putative 3-methyladenine DNA glycosylase	0.14			2			7.94979	10.4603
pae:PA0592	KSGA	ksgA; dimethyladenosine transferase ; K025	Dimethyladenosine transferase	0.13			2			7.08955	8.58209
pae:PA3818	SUHB	extragenic suppressor protein SuhB ; K0109	Inositol-1-monophosphatase	0.13			3			9.22509	11.0701
pae:PA0357	FPG	mutM; formamidopyrimidine-DNA glycosylase	Formamidopyrimidine-DNA glycosylase	0.12			4			12.5926	16.2963
pae:PA5323	ARGB	argB; acetylglutamate kinase (EC:2.7.2.8);	Acetylglutamate kinase	0.12			5			5.98007	6.64452
pae:PA0024	HEM6	hemF; coproporphyrinogen III oxidase (EC:1	Coproporphyrinogen-III oxidase aerobic	0.11			3			8.19672	11.8033
pae:PA5173	ARCC	arcC; carbamate kinase (EC:2.7.2.2); K0092	Carbamate kinase	0.11			2			6.45161	9.03226
pae:PA0901	ASTE	aruE; succinylglutamate desuccinylase ; K0	Succinylglutamate desuccinylase	0.1			2			6.92771	10.241
pae:PA0280	CYSA	cysA; sulfate transport protein CysA ; K02	Sulfate/thiosulfate import ATP-binding protein cysA	0.1			2			9.11854	7.29483
pae:PA3527	PYRC	pyrC; dihydroorotase (EC:3.5.2.3); K01465	Dihydroorotase	0.1			2			7.75862	8.90805
pae:PA0971	TOLA	tolA; TolA protein ; K03646 colicin import	Protein tolA	0.1			3			12.3919	22.4784
pae:PA0546	METK	metK; S-adenosylmethionine synthetase (EC:	S-adenosylmethionine synthetase	0.09			2			6.31313	6.06061
pae:PA4565	PROB	proB; gamma-glutamyl kinase (EC:2.7.2.11);	Glutamate 5-kinase	0.09			2			7.52688	11.2903
pae:PA3806	RLMN1	hypothetical protein ; K06941 ribosomal RN	Ribosomal RNA large subunit methyltransferase N 1	0.09			4			12.1372	12.4011
pae:PA3247	APEB	putative aminopeptidase 2 ; K01269 aminope	Probable M18-family aminopeptidase 2	0.08			2			6.99301	10.0233
pae:PA4808	SELA	selA; selenocysteine synthase (EC:2.9.1.1)	L-seryl-tRNA(Sec) selenium transferase	0.07			2			9.40171	13.0342
pae:PA1803	LON	lon; Lon protease ; K01338 ATP-dependent L	ATP-dependent protease La	0.04			4			8.14536	10.401
pae:PA3645	FABZ	fabZ; (3R)-hydroxymyristoyl-ACP dehydratas	(3R)-hydroxymyristoyl-[acyl-carrier-protein] dehydratase	0			2			5.47945	4.10959
pae:PA4730	PANC	panC; pantoate--beta-alanine ligase (EC:6.	Pantothenate synthetase	0			3			8.83392	8.48057
pae:PA0969	TOLQ	tolQ; TolQ protein ; K03562 biopolymer tra	Protein tolQ	0.52			5			6.92641	8.65801
pae:PA0867	MLIC	mliC; lysozyme inhibitor	Membrane-bound lysozyme inhibitor of C-type lysozyme	0.28			2			7.08661	11.0236
pae:PA5568	OXAA	putative inner membrane protein translocas	Inner membrane protein oxaA	0.25			5			9.86159	11.7647
pae:PA0523	NORC	norC; nitric-oxide reductase subunit C ; K	Nitric oxide reductase subunit C	0.24			2			6.84932	8.21918
pae:PA1084	FLGI	flgI; flagellar basal body P-ring protein	Flagellar P-ring protein	0.21			4			6.77507	10.0271
pae:PA1074	BRAC	braC; branched-chain amino acid transport	Leucine-isoleucine-valine-threonine-and alanine-binding protein	0.2			3			7.5067	8.31099
pae:PA4765	OMLA	omlA; outer membrane lipoprotein OmlA prec	Outer membrane lipoprotein omlA	0.2			4			9.09091	16.4773
pae:PA5078	OPGG	mdoG, opgG; glucan biosynthesis protein G	Glucans biosynthesis protein G	0.13			11			9.52381	10.0952
pae:PA4845	DSBD1	dipZ; thiol:disulfide interchange protein	Thiol:disulfide interchange protein dsbD 1	0.12			3			6.09137	7.1066
pae:PA1423	BDLA	bdlA; BdlA ; K03406 methyl-accepting chemo	Biofilm dispersion protein bdlA	0.08			2			10.7914	12.47
pae:PA1820	NHAB	nhaB; sodium/proton antiporter ; K03314 Na	Na(+)/H(+) antiporter nhaB	0.07			2			4.6	6
pae:PA3922	Y3922	hypothetical protein	Uncharacterized protein PA3922	0.07			3			10.7692	11.2088
pae:PA2920	HLYB	putative chemotaxis transducer ; K03406 me	Hemolysin secretion protein	0.06			2			8.07339	10.8257
pae:PA1032	QUIP	quiP; QuiP ; K07116	Acyl-homoserine lactone acylase quiP	0.04			3			10.3896	13.1051
